# Supplementary material for: Fortification of Fermented Camel Milk with Salvia officinalis L. or Mentha piperita Leaves Powder and Its Biological Effects on Diabetic Rats
Source: MDPI journal article supplement (doi:10.3390/molecules28155749), 2023-07-29
Supplement: s1 [file s1]

# Fortification of fermented camel milk with *Salvia officinalis* L. or *Mentha piperita* leaves powder and its biological effects on diabetic rats

Magdy Ramadan Shahein <sup>1</sup>, Mahmoud Ibrahim El-Sayed <sup>2</sup>, Enrique Raya-Álvarez <sup>3</sup>, Abdelmoneim Ahmed Elmeligy <sup>4</sup>, Mohamed A. Mohamady Hussein <sup>5</sup>, Murad A. Mubarak <sup>6</sup>, Ahmad Agil <sup>7</sup>, and Ehab Kotb Elmahallawy <sup>8,9\*</sup>

<sup>1</sup> Department of Food Science and Technology, Faculty of Agriculture, Tanta University, 31527 Tanta, Egypt. magdrsh10@gmail.com (M.R.S)

<sup>2</sup> Department of Dairy Technology Research, Food Technology Research Institute, Agricultural Research Center, Giza, Egypt; mahmoud.elsayed@arc.sci.eg (M.I.E-S)

<sup>3</sup> Rheumatology Department, Hospital Universitario San Cecilio, Av. de la Investigación, s/n, 18016 Granada, Spain.; enriraya@ugr.es (E.R-A)

<sup>4</sup> Department of Pathology, Faculty of Veterinary Medicine, Suez Canal University, Ismailia, Egypt. elmeligy52@yahoo.com (A.A.E)

<sup>5</sup> Department of Pharmacology, Medical Research and Clinical Studies Institute, National Research Centre, 33 El Bohouth St., Dokki, Giza 12622, Egypt; almohammadeymr2023@gmail.com (M.A.M.H)

<sup>6</sup> Clinical Laboratory Sciences Department, College of Applied Medical Sciences, King Saud University, Saudi Arabia; mmubarak@ksu.edu.sa (M.A.M)

<sup>7</sup> Department of Pharmacology, Biohealth Institute Granada (IBs Granada) and Neuroscience Institute, School of Medicine, University of Granada, 18016 Granada, Spain; aagil@ugr.es (A.A)

<sup>8</sup> Departamento de Sanidad Animal, Grupo de Investigación en Sanidad Animal y Zoonosis (GISAZ), Facultad de Veterinaria, Universidad de Córdoba, Córdoba, Spain; eehaa@unileon.es (E.K.E)

<sup>9</sup> Department of Zoonoses, Faculty of Veterinary Medicine, Sohag University, Sohag 82524, Egypt; eehaa@unileon.es (E.K.E)

Correspondence: eehaa@unileon.es (E.K.E.)

**Table S1.** MRM transitions and the optimized mass spectrometer parameters.

| Name                      | Q1<br>(m/z) | Q3<br>(m/z) | Expected RT (min) | CE (V) | CXP (V) | DP (V) |
|---------------------------|-------------|-------------|-------------------|--------|---------|--------|
| Gallic acid               | 168.9       | 124.9       | 3.9               | -30    | -11     | -110   |
|                           | 168.9       | 79          | 3.9               | -30    | -11     | -110   |
| 3,4-Dihydroxybenzoic acid | 152.9       | 109         | 5.8               | -40    | -5      | -75    |
|                           | 152.9       | 90.9        | 5.8               | -20    | -7      | -75    |
| Catechin                  | 288.8       | 244.9       | 7.3               | -16    | -8      | -40    |
|                           | 288.8       | 109         | 7.3               | -32    | -8      | -40    |
| Methyl gallate            | 183         | 124         | 7.5               | -30    | -10     | -110   |
|                           | 183         | 140         | 7.5               | -30    | -10     | -110   |
| Chlorogenic acid          | 355.1       | 163         | 7.8               | 21     | 10      | 46     |
|                           | 355.1       | 89          | 7.8               | 75     | 14      | 46     |
| Caffeic acid              | 178.9       | 135         | 8                 | -22    | -9      | -115   |
|                           | 178.9       | 107         | 8                 | -30    | -7      | -115   |
| Syringic acid             | 196.9       | 122.8       | 8.4               | -24    | -5      | -30    |
|                           | 196.9       | 181.9       | 8.4               | -12    | -5      | -30    |
| Coumaric acid             | 162.9       | 119         | 9.5               | -20    | -7      | -90    |
|                           | 162.9       | 93          | 9.5               | -40    | -5      | -90    |
| Vanillin                  | 151         | 136         | 9.6               | -12    | -9      | -140   |
|                           | 151         | 92          | 9.6               | -16    | -7      | -140   |
| Rutin                     | 609         | 299.9       | 9.7               | -48    | -15     | -230   |
|                           | 609         | 270.9       | 9.7               | -70    | -9      | -230   |
| Ellagic acid              | 301         | 145         | 9.9               | -40    | -14     | -120   |
|                           | 301         | 245         | 9.9               | -38    | -14     | -120   |
| Ferulic acid              | 192.8       | 133.9       | 10.2              | -16    | -5      | -25    |
|                           | 192.8       | 177.9       | 10.2              | -12    | -5      | -25    |
| Daidzein                  | 255.1       | 199         | 13.4              | 28     | 10      | 125    |
|                           | 255.1       | 91.1        | 13.4              | 44     | 10      | 125    |
| Luteolin                  | 284.7       | 132.9       | 13.5              | -38    | -10     | -50    |
|                           | 284.7       | 150.9       | 13.5              | -26    | -10     | -50    |
| Quercetin                 | 301         | 151         | 13.6              | -28    | -9      | -50    |
|                           | 301         | 178.8       | 13.6              | -20    | -7      | -50    |
| Cinnamic acid             | 146.9       | 102.6       | 14.2              | -17    | -6      | -60    |
|                           | 146.9       | 77          | 14.2              | -33    | -6      | -60    |
| Naringenin                | 271         | 151         | 15                | -24    | -25     | -130   |
|                           | 271         | 119         | 15                | -34    | -11     | -130   |
| Apigenin                  | 269         | 151         | 15                | -15    | -7      | -35    |
|                           | 269         | 117         | 15                | -15    | -7      | -35    |
| Kaempferol                | 284.7       | 93          | 15.3              | -46    | -10     | -120   |
|                           | 284.7       | 116.8       | 15.3              | -52    | -10     | -120   |
| Hesperetin                | 301         | 164         | 15.6              | -23    | -10     | -125   |

|  |     |     |      |     |     |      |
|--|-----|-----|------|-----|-----|------|
|  | 301 | 136 | 15.6 | -38 | -10 | -125 |
|--|-----|-----|------|-----|-----|------|

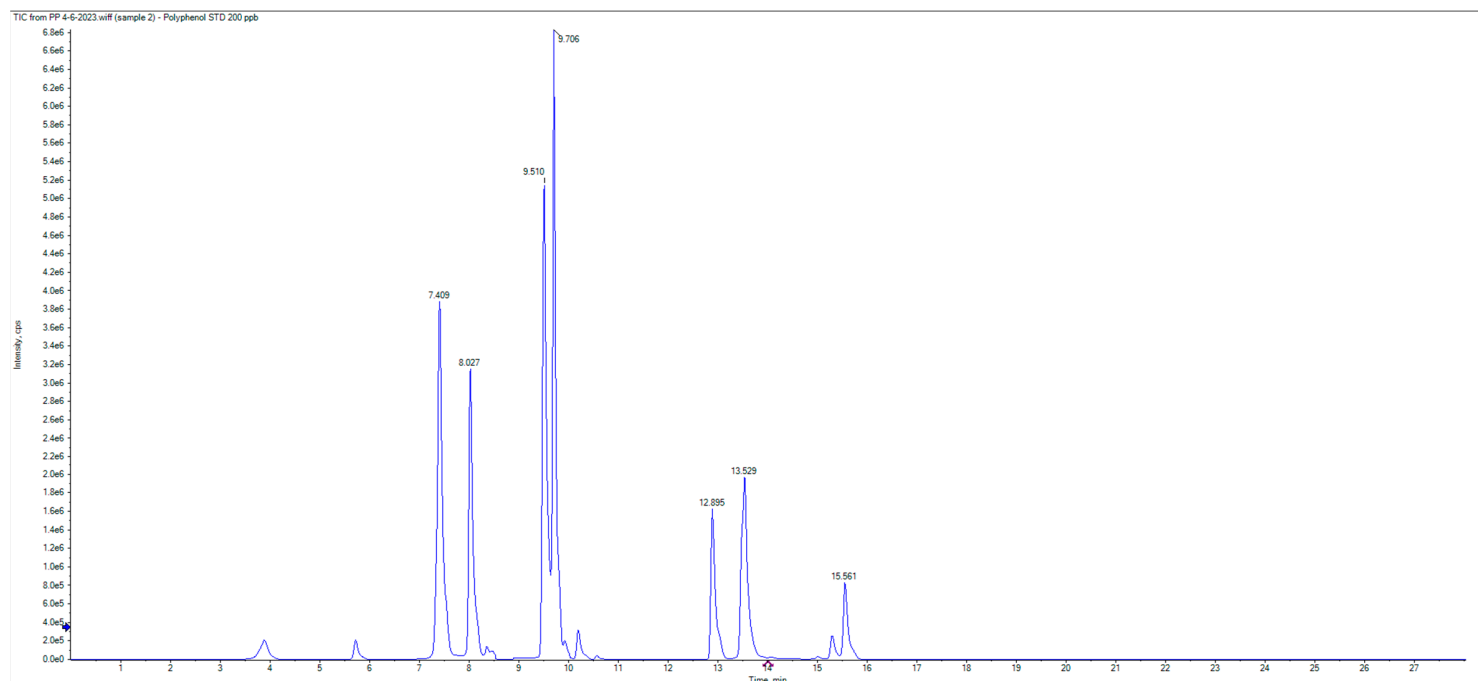

**Figure S1.** LC-ESI-MS spectra of standards.

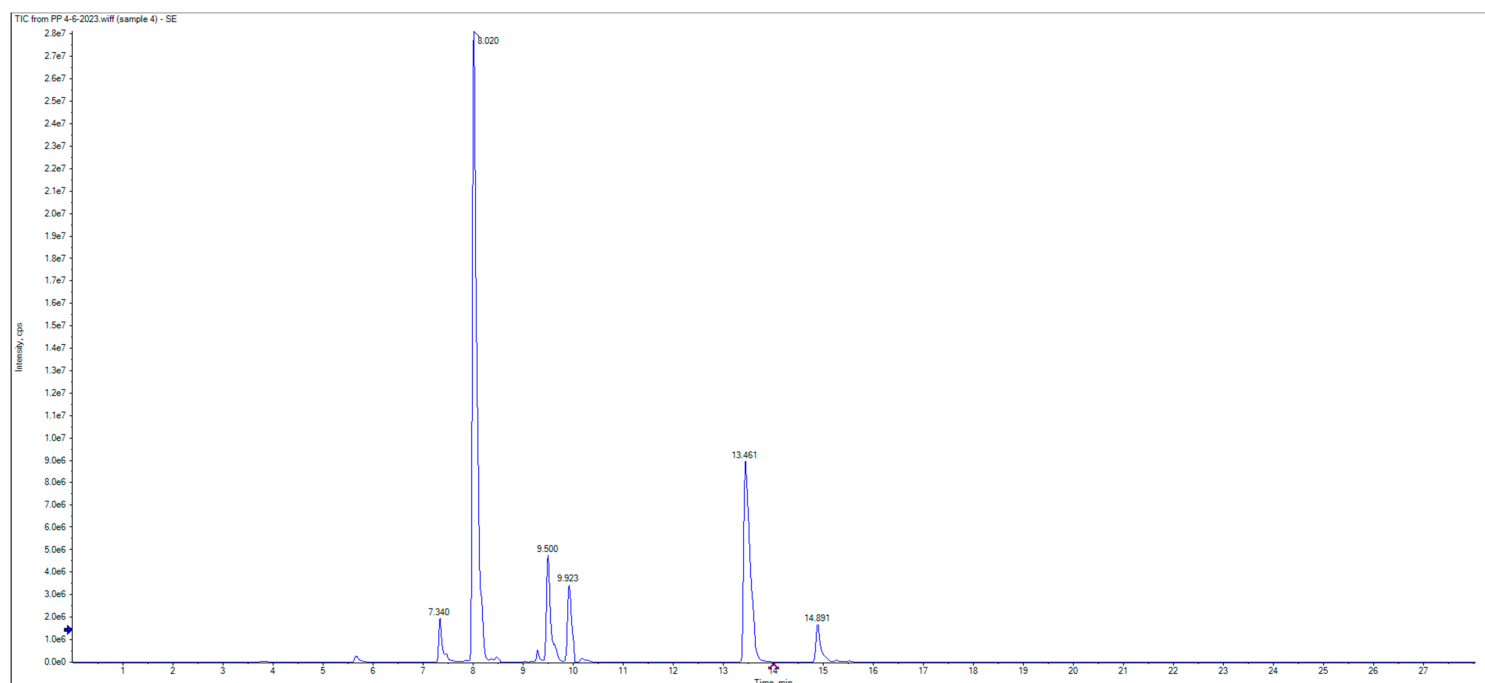

**Figure S2.** LC-ESI-MS spectra of sage extract.

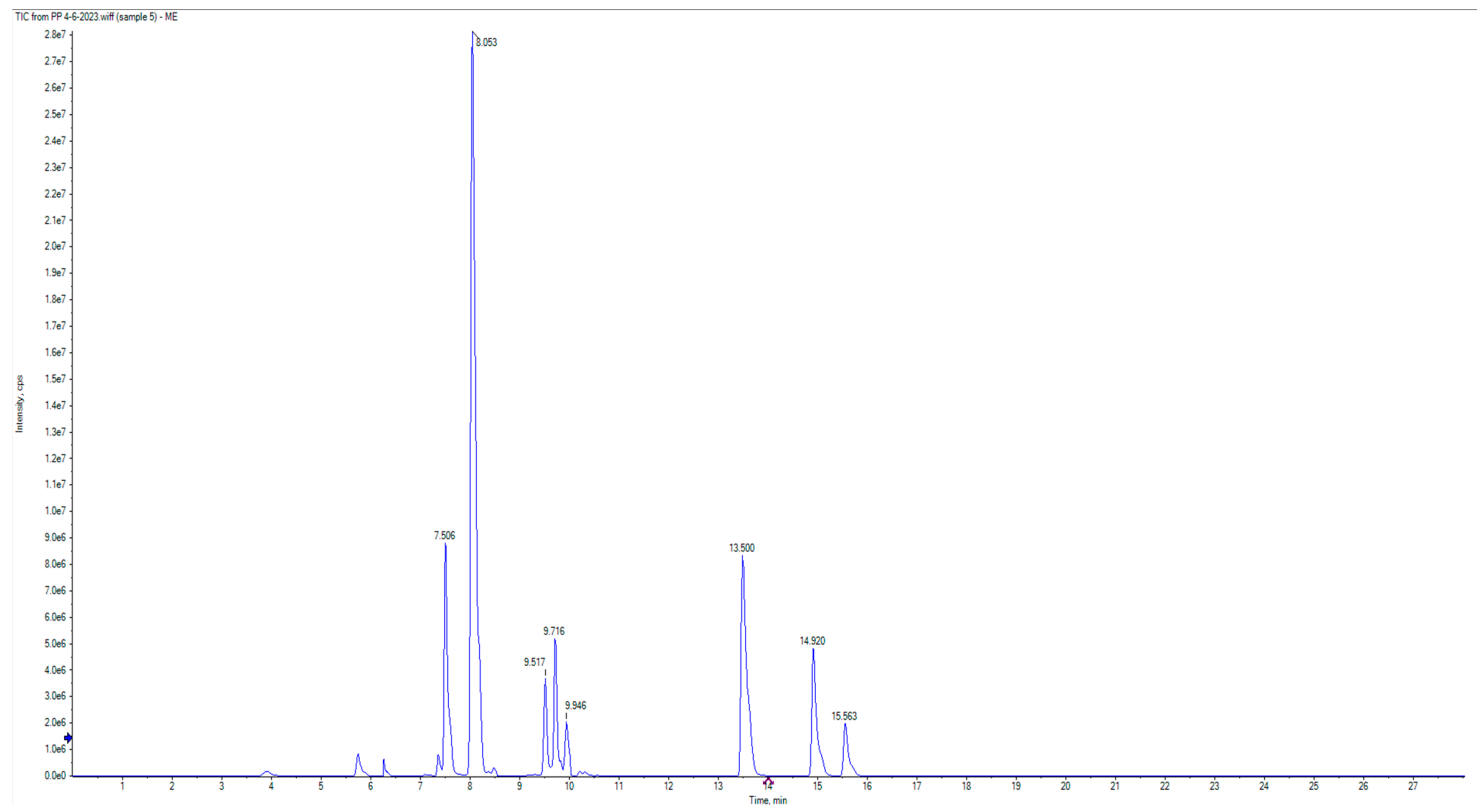

**Figure S3.** LC-ESI-MS spectra of mint extract.
